# Supplementary material
Source: publisher figshare collection journal article supplement (https://springernature.figshare.com/ndownloader/files/20030357)
Supplement: Supplementary file [file 20030357]

**Table S1. World Cancer Research Fund/ American Institute for Cancer Research (WCRF/AICR) cancer prevention recommendations and operationalization of the WCRF/AICR lifestyle score in the European Prospective Investigation into Cancer and Nutrition (EPIC) cohort<sup>1</sup>**

| WCRF/AICR cancer prevention recommendation | Operationalization                                                                  | Scoring                           |
|--------------------------------------------|-------------------------------------------------------------------------------------|-----------------------------------|
| Be a healthy weight                        | - BMI: 18.5 - 24.9 kg/m <sup>2</sup>                                                | 1                                 |
|                                            | - BMI: 25.0 - 29.9 kg/m <sup>2</sup>                                                | 0.5                               |
|                                            | - BMI <18.5 or BMI >30.0 kg/m <sup>2</sup>                                          | 0                                 |
| Be physically active                       | - Manual/heavy manual job, or >2 h/wk of vigorous PA or >30 min/d of cycling/sports | 1                                 |
|                                            | - 15-30 min/d of cycling/sports                                                     | 0.5                               |
|                                            | - <15 min/d of cycling/sports                                                       | 0                                 |
| Eat wholegrains, vegetables, fruit, beans  | - Fruits and vegetables ≥400 g/d                                                    | 1                                 |
|                                            | - 200≤ Fruits and vegetables <400 g/d                                               | 0.5                               |
|                                            | - Fruits and vegetables <200 g/d                                                    | 0                                 |
|                                            | - Dietary fiber ≥25 g/d                                                             | 1                                 |
|                                            | - 12.5≤ Dietary fiber <25 g/d                                                       | 0.5                               |
|                                            | - Dietary fiber <12.5 g/d                                                           | 0                                 |
| Limit 'fast foods'                         | - ED≤ 125 kcal/100 g/d                                                              | 1                                 |
|                                            | - 125≤ ED≤ 175 kcal/100 g/d                                                         | 0.5                               |
|                                            | - ED>175 kcal/100 g/d                                                               | 0                                 |
| Limit red & processed meat                 | - Red and processed meat <500 g/wk and processed meat intake <3 g/d                 | 1                                 |
|                                            | - Red and processed meat <500 g/wk and 3 < processed meat intake <50 g/d            | 0.5                               |
|                                            | - Red and processed meat >500 g/wk or processed meat intake ≥50 g/d                 | 0                                 |
| Limit sugary drinks                        | - Sugary drinks: 0 g/d                                                              | 1                                 |
|                                            | - 0< Sugary drinks ≤250 g/d                                                         | 0.5                               |
|                                            | - Sugary drinks >250 g/d                                                            | 0                                 |
| Limit alcohol                              | - Ethanol intake ≤10 g/d                                                            | 1                                 |
|                                            | - 10< Ethanol intake ≤20 g/d                                                        | 0.5                               |
|                                            | - Ethanol intake >20 g/d                                                            | 0                                 |
| Don't rely on supplements                  | Not applicable to this population                                                   | Not applicable to this population |
| Breastfeed your baby                       | - Cumulative breastfeeding ≥6 months                                                | 1                                 |
|                                            | - 0< Cumulative breastfeeding <6 months                                             | 0.5                               |
|                                            | - No breastfeeding                                                                  | 0                                 |
| After a cancer diagnosis                   | Not applicable to this population                                                   | Not applicable to this population |

<sup>1</sup> ED: Energy density. ED was calculated as energy (kcal) from foods (solid, semi-solid and liquid foods) divided by the weights (g) of these foods. Drinks were not included in the calculation. Abbreviations: BMI: Body mass index; g/d: grams per day; g/wk: grams per week; min/day: minutes per day; h/wk: hours per week

**Table S2. The proportion of primary in situ breast cancer cases over the total primary breast cancer cases diagnosed in the European Prospective Investigation into Cancer and Nutrition (EPIC) cohort**

| Country/ Center        | Primary in situ breast cancer cases | Total primary breast cancer cases <sup>1</sup> | Proportion primary in situ breast cancer / total primary breast cancer cases % |
|------------------------|-------------------------------------|------------------------------------------------|--------------------------------------------------------------------------------|
| <b>France</b>          | 439                                 | 3,365                                          | 13.0                                                                           |
| Ile-de-France          | 85                                  | 684                                            | 12.4                                                                           |
| North-West of France   | 67                                  | 592                                            | 11.3                                                                           |
| North-East of France   | 93                                  | 736                                            | 12.6                                                                           |
| Rhone-Alpes/Auvergne   | 66                                  | 419                                            | 15.8                                                                           |
| Provence/Languedoc     | 62                                  | 473                                            | 13.1                                                                           |
| South-West of France   | 66                                  | 461                                            | 14.3                                                                           |
| <b>Italy</b>           | 116                                 | 1,316                                          | 8.8                                                                            |
| Florence               | 57                                  | 467                                            | 12.2                                                                           |
| Varese                 | 26                                  | 414                                            | 6.3                                                                            |
| Ragusa                 | 5                                   | 106                                            | 4.7                                                                            |
| Turin                  | 21                                  | 179                                            | 11.7                                                                           |
| Naples                 | 7                                   | 150                                            | 4.7                                                                            |
| <b>Spain</b>           | 69                                  | 704                                            | 9.8                                                                            |
| Asturias               | 18                                  | 136                                            | 13.2                                                                           |
| Granada                | 10                                  | 142                                            | 7.0                                                                            |
| Murcia                 | 6                                   | 141                                            | 4.3                                                                            |
| Navarra                | 14                                  | 147                                            | 9.5                                                                            |
| San Sebastian          | 21                                  | 138                                            | 15.2                                                                           |
| <b>United Kingdom</b>  | 256                                 | 1,964                                          | 13.0                                                                           |
| Cambridge              | 67                                  | 504                                            | 13.3                                                                           |
| Oxford                 | 189                                 | 1460                                           | 12.9                                                                           |
| <b>The Netherlands</b> |                                     |                                                |                                                                                |
| Utrecht                | 102                                 | 832                                            | 12.3                                                                           |
| <b>Greece</b>          | 16                                  | 256                                            | 6.3                                                                            |
| <b>Germany</b>         | 93                                  | 899                                            | 10.3                                                                           |
| Heidelberg             | 49                                  | 505                                            | 9.7                                                                            |
| Potsdam                | 44                                  | 394                                            | 11.2                                                                           |
| <b>Sweden</b>          |                                     |                                                |                                                                                |
| Malmö                  | 66                                  | 902                                            | 7.3                                                                            |
| <b>Denmark</b>         | 120                                 | 1,951                                          | 6.2                                                                            |
| Aarhus                 | 25                                  | 512                                            | 4.9                                                                            |
| Copenhagen             | 95                                  | 1,439                                          | 6.6                                                                            |

<sup>1</sup> Total breast cancer cases include all primary in situ breast cancers and all primary invasive breast cancers diagnosed in the EPIC cohort.

**Table S3. Association between the World Cancer Research Fund/ American Institute for Cancer Research (WCRF/AICR) lifestyle score and risk for the most common morphological subtypes of in situ breast cancer in the total study population and according to recruitment mode in the European Prospective Investigation into Cancer and Nutrition (EPIC) cohort <sup>1</sup>**

|                                             | Total study population (n=260,151) |                  |                  | Screening-recruited cohorts (n=24,727) |                  |                  | Other centers (n=235,424) |                  |                  |
|---------------------------------------------|------------------------------------|------------------|------------------|----------------------------------------|------------------|------------------|---------------------------|------------------|------------------|
|                                             | Model 1                            |                  | Model 2          | Model 1                                |                  | Model 2          | Model 1                   |                  | Model 2          |
|                                             | N cases/<br>non-cases              | HR (95% CI)      | HR (95% CI)      | N cases/<br>non-cases                  | HR (95% CI)      | HR (95% CI)      | N cases/<br>non-cases     | HR (95% CI)      | HR (95% CI)      |
| <b>Ductal Carcinoma In Situ</b>             |                                    |                  |                  |                                        |                  |                  |                           |                  |                  |
| WCRF/AICR lifestyle score, continuous (0-8) | 938/259,213                        | 0.96 (0.90-1.02) | 0.97 (0.91-1.03) | 129/24,598                             | 0.86 (0.73-1.01) | 0.87 (0.74-1.04) | 809/234,615               | 0.98 (0.92-1.05) | 0.99 (0.92-1.05) |
| WCRF/AICR lifestyle score 0-3               | 91/26,718                          | Ref.             | Ref.             | 16/2,430                               | Ref.             | Ref.             | 75/24,288                 | Ref.             | Ref.             |
| WCRF/AICR lifestyle score >3-5              | 603/157,600                        | 1.13 (0.90-1.41) | 1.14 (0.91-1.43) | 85/14,929                              | 0.83 (0.48-1.42) | 0.86 (0.50-1.48) | 518/142,671               | 1.19 (0.93-1.52) | 1.20 (0.94-1.53) |
| WCRF/AICR lifestyle score >5                | 244/74,895                         | 0.94 (0.74-1.21) | 0.97 (0.75-1.24) | 28/7,239                               | 0.56 (0.30-1.05) | 0.60 (0.32-1.13) | 216/67,656                | 1.03 (0.79-1.34) | 1.05 (0.80-1.37) |
| <b>Lobular Carcinoma In Situ</b>            |                                    |                  |                  |                                        |                  |                  |                           |                  |                  |
| WCRF/AICR lifestyle score, continuous (0-8) | 96/260,055                         | 0.90 (0.74-1.08) | 0.91 (0.75-1.10) | 4/24,723                               | 0.99 (0.38-2.58) | 0.78 (0.27-2.26) | 92/235,332                | 0.89 (0.74-1.08) | 0.90 (0.74-1.10) |
| WCRF/AICR lifestyle score 0-3               | 14/26,795                          | Ref.             | Ref.             |                                        | Ref.             | Ref.             | 14/24,349                 | Ref.             | Ref.             |
| WCRF/AICR lifestyle score >3-5              | 55/158,148                         | 0.72 (0.39-1.32) | 0.74 (0.40-1.35) |                                        | -                | -                | 52/143,137                | 0.67 (0.37-1.25) | 0.69 (0.37-1.28) |
| WCRF/AICR lifestyle score >5                | 27/75,112                          | 0.69 (0.35-1.35) | 0.71 (0.36-1.42) |                                        | -                | -                | 26/67,846                 | 0.66 (0.33-1.30) | 0.68 (0.34-1.36) |

<sup>1</sup> Model 1: Adjusted for highest level of attained education (none/primary school, technical /secondary school, university), smoking status (never smoker, former smoker, current smoker) and total energy intake (kcal/d); Model 2: Model 1 and additionally adjusted for presence of chronic diseases at recruitment (yes/no), age at menarche (<12y, ≥12 to ≤15y, >15y), age at first full-term pregnancy (<21y, ≥21 to ≤30y, >30y), menopausal status (premenopausal, perimenopausal, postmenopausal (also including surgical postmenopausal)), ever use of oral contraceptive pills (yes/no) and ever use of menopausal hormone therapy (yes/no). All analyses were stratified for center and age at recruitment (1-year intervals). Due to the low number of lobular carcinoma in situ tumors diagnosed in the screening recruited cohorts, analyses using the WCRF/AICR lifestyle score categories could not be carried out. Abbreviations: CI: confidence interval; HR: hazard ratio

**Table S4. Associations between the individual components of the World Cancer Research Fund/ American Institute for Cancer Research (WCRF/AICR) lifestyle score and in situ breast cancer risk by menopausal status and menopausal hormone use in the total study population (n= 260,151) <sup>1</sup>**

| WCRF/AICR cancer prevention recommendation * | Premenopausal<br>(n=86,757)   |                  | Post or peri-menopausal<br>never users (n=106,592) |                  | Post or peri-menopausal<br>ever users (n=66,802) |                  |
|----------------------------------------------|-------------------------------|------------------|----------------------------------------------------|------------------|--------------------------------------------------|------------------|
|                                              | Number of cases/<br>non-cases | HR (95% CI)      | Number of<br>cases/ non-cases                      | HR (95% CI)      | Number of<br>cases/ non-cases                    | HR (95% CI)      |
| Limit sugary drinks                          |                               |                  |                                                    |                  |                                                  |                  |
| 0                                            | 58/16,546                     | Ref.             | 57/12,887                                          | Ref.             | 74/10,156                                        | Ref.             |
| 0.5                                          | 235/51,976                    | 1.01 (0.74-1.37) | 294/66,707                                         | 1.03 (0.76-1.38) | 270/41,974                                       | 0.82 (0.63-1.08) |
| 1                                            | 81/17,861                     | 1.02 (0.68-1.52) | 125/26,521                                         | 1.11 (0.78-1.59) | 83/14,246                                        | 0.77 (0.53-1.10) |
| Breastfeed your baby                         |                               |                  |                                                    |                  |                                                  |                  |
| 0                                            | 121/30,422                    | Ref.             | 150/28,231                                         | Ref.             | 136/18,384                                       | Ref.             |
| 0.5                                          | 134/29,585                    | 1.00 (0.73-1.38) | 171/35,021                                         | 0.94 (0.72-1.22) | 161/25,848                                       | 0.99 (0.75-1.32) |
| 1                                            | 119/26,376                    | 0.97 (0.69-1.37) | 155/42,863                                         | 0.99 (0.74-1.31) | 130/22,144                                       | 1.02 (0.75-1.39) |
| Limit alcohol                                |                               |                  |                                                    |                  |                                                  |                  |
| 0                                            | 51/10,286                     | Ref.             | 84/13,550                                          | Ref.             | 78/10,700                                        | Ref.             |
| 0.5                                          | 63/14,983                     | 0.95 (0.65-1.38) | 80/17,014                                          | 0.79 (0.58-1.09) | 89/12,970                                        | 0.93 (0.68-1.26) |
| 1                                            | 260/61,114                    | 1.06 (0.77-1.46) | 312/75,552                                         | 0.79 (0.61-1.03) | 260/42,705                                       | 0.84 (0.64-1.10) |
| Limit red & processed meat                   |                               |                  |                                                    |                  |                                                  |                  |
| 0                                            | 149/30,710                    | Ref.             | 215/40,071                                         | Ref.             | 166/28,110                                       | Ref.             |
| 0.5                                          | 151/34,665                    | 0.95 (0.74-1.22) | 206/48,462                                         | 0.91 (0.74-1.12) | 231/32,064                                       | 1.31 (1.05-1.63) |
| 1                                            | 74/21,008                     | 0.91 (0.62-1.34) | 56/17,582                                          | 1.01 (0.71-1.43) | 29/6,202                                         | 0.87 (0.56-1.33) |
| Eat wholegrains, vegetables, fruit, beans    |                               |                  |                                                    |                  |                                                  |                  |
| 0                                            | 39/7,758                      | Ref.             | 37/9,639                                           | Ref.             | 33/5,595                                         | Ref.             |
| 0.25                                         | 58/12,299                     | 0.94 (0.62-1.44) | 68/14,840                                          | 1.12 (0.74-1.71) | 65/9,410                                         | 1.22 (0.79-1.90) |
| 0.5                                          | 95/25,259                     | 0.70 (0.46-1.07) | 132/30,582                                         | 0.94 (0.62-1.42) | 125/20,361                                       | 1.01 (0.66-1.57) |
| 0.75                                         | 114/26,547                    | 0.82 (0.52-1.30) | 153/33,099                                         | 1.04 (0.67-1.62) | 138/19,695                                       | 1.19 (0.74-1.89) |
| 1                                            | 68/14,520                     | 0.84 (0.48-1.48) | 85/17,955                                          | 1.04 (0.61-1.77) | 67/11,315                                        | 1.03 (0.58-1.81) |
| Limit 'fast foods'                           |                               |                  |                                                    |                  |                                                  |                  |

|                      |            |                  |            |                  |            |                  |
|----------------------|------------|------------------|------------|------------------|------------|------------------|
| 0                    | 57/12,670  | Ref.             | 40/11,285  | Ref.             | 41/7,729   | Ref.             |
| 0.5                  | 222/50,973 | 0.91 (0.66-1.28) | 298/62,674 | 1.36 (0.94-1.97) | 267/39,970 | 1.15 (0.79-1.66) |
| 1                    | 95/22,740  | 0.88 (0.55-1.40) | 138/32,156 | 1.32 (0.84-2.08) | 119/18,677 | 0.94 (0.59-1.49) |
| Be physically active |            |                  |            |                  |            |                  |
| 0                    | 167/41,601 | Ref.             | 229/56,207 | Ref.             | 193/30,232 | Ref.             |
| 0.5                  | 74/15,128  | 1.14 (0.86-1.51) | 85/16,124  | 1.01 (0.78-1.31) | 98/12,126  | 1.20 (0.93-1.54) |
| 1                    | 133/29,654 | 1.22 (0.96-1.56) | 163/33,785 | 0.97 (0.78-1.21) | 135/24,017 | 0.90 (0.71-1.13) |
| Be a healthy weight  |            |                  |            |                  |            |                  |
| 0                    | 28/11,136  | Ref.             | 75/21,344  | Ref.             | 40/8,232   | Ref.             |
| 0.5                  | 80/20,687  | 1.50 (0.97-2.32) | 147/35,152 | 0.93 (0.70-1.24) | 132/20,475 | 1.24 (0.86-1.77) |
| 1                    | 266/54,560 | 1.61 (1.08-2.41) | 254/49,620 | 0.85 (0.65-1.12) | 255/37,668 | 1.07 (0.76-1.52) |

---

<sup>1</sup> Models adjusted for highest level of attained education (none/primary school, technical /secondary school, university), smoking status (never smoker, former smoker, current smoker), total energy intake (kcal/d), the remaining components of the WCRF/AICR score, the presence of chronic diseases at baseline (yes/no), age at menarche (<12y, ≥12 to ≤15y, >15y), age at first full-term pregnancy (<21y, ≥21 to ≤30y, >30y), and ever use of oral contraceptive pills (yes/no). All analyses were stratified for center and age at recruitment (1-year intervals). The case/non-case numbers presented are estimated as the average of the 5 imputed datasets. \*Detailed information on the operationalization of the WCRF/AICR lifestyle score can be found in Additional file 1: Table S1. Abbreviations: CI: confidence interval; HR: hazard ratio
